# Supplementary material for: Knockdown of PKM2 enhances radiosensitivity of cervical cancer cells
Source: Springer Nature journal article supplement (doi:10.1186/s12935-019-0845-7), 2019-05-14
Supplement: MOESM2 [file 16723508]

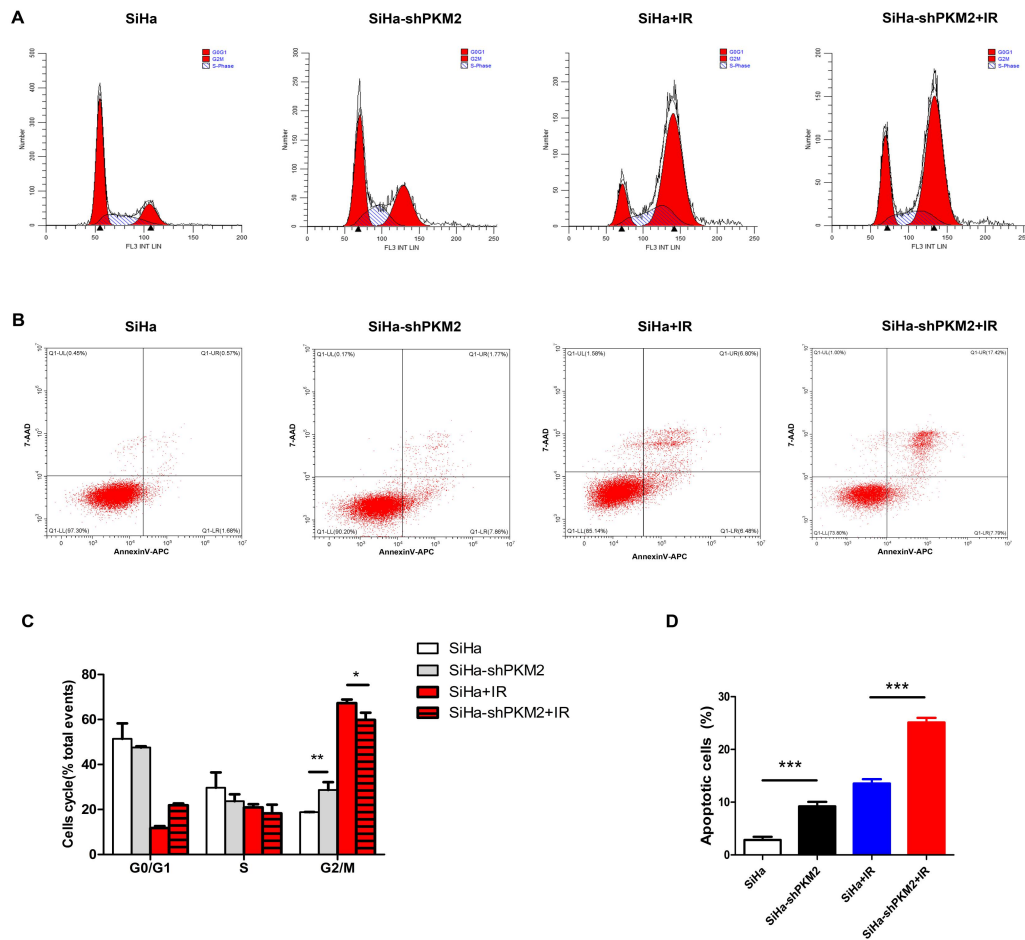

**Figure S1: Knockdown of PKM2 induces a G2/M cell cycle arrest and apoptosis in SiHa cells. (A)** Cell cycle distribution was measured through flow cytometry. Graphic representation of flow cytometry data showing percentage of cells in G1, S, and G2/M phases. **(B)** Knockdown of PKM2 significantly promoted cell apoptosis after radiation treatment in SiHa cells. **(C)** Graphic representation of flow cytometry data showing percentage of cells in G1, S, and G2/M phases. \* $P < 0.05$ , \*\* $P < 0.01$ . **(D)** Statistical image of cell apoptosis, \*\*\* $P < 0.01$ .
